# Supplementary material for: Polyfluorinated carba-closo-dodecaboranes with amino and ammonio substituents bonded to boron
Source: Royal Society of Chemistry journal article supplement (doi:10.1039/c5dt02055g), 2015-01-01
Supplement: c5dt02055g1.pdf [file c5dt02055g1.pdf]

## Supplementary Data to

# Polyfluorinated carba-*closo*-dodecaboranes with amino and ammonio substituents bonded to boron

*Szymon Z. Konieczka,<sup>a</sup> Michael Drisch,<sup>a</sup> Katharina Edkins,<sup>b</sup> Michael Hailmann<sup>a</sup>  
and Maik Finze<sup>\*a</sup>*

<sup>a</sup> Institut für Anorganische Chemie, Julius-Maximilians-Universität Würzburg, Am Hubland, 97074  
Würzburg, Germany

<sup>b</sup> School of Medicine, Pharmacy and Health, Durham University, University Boulevard,  
Stockton-on-Tees, TS17 6BH, UK

**Table S1** Crystal data and structure refinement parameters for 1-H-12-H<sub>3</sub>N-*closo*-1-CB<sub>11</sub>F<sub>10</sub>·H<sub>2</sub>O (**H1**·H<sub>2</sub>O), 1-H-7-H<sub>3</sub>N-*closo*-1-CB<sub>11</sub>F<sub>10</sub>·diglyme (**H2**·diglyme), 1-H-2-H<sub>3</sub>N-*closo*-1-CB<sub>11</sub>F<sub>10</sub>·0.5H<sub>2</sub>O (**H3**·0.5H<sub>2</sub>O), [Et<sub>4</sub>N][1-H-12-H<sub>2</sub>N-*closo*-1-CB<sub>11</sub>F<sub>10</sub>] ([Et<sub>4</sub>N]**1**) and 7-H<sub>3</sub>N-12-F-*closo*-1-CB<sub>11</sub>H<sub>10</sub>·(CH<sub>3</sub>)<sub>2</sub>CO (**H4**·(CH<sub>3</sub>)<sub>2</sub>CO).

| Compound                                                      | H1·H <sub>2</sub> O                                | H2·diglyme                                                                     | H3·0.5H <sub>2</sub> O                                            | [Et <sub>4</sub> N] <b>1</b>                                                  | H4·(CH <sub>3</sub> ) <sub>2</sub> CO              |
|---------------------------------------------------------------|----------------------------------------------------|--------------------------------------------------------------------------------|-------------------------------------------------------------------|-------------------------------------------------------------------------------|----------------------------------------------------|
| Formula                                                       | CH <sub>6</sub> B <sub>11</sub> F <sub>10</sub> NO | C <sub>7</sub> H <sub>18</sub> B <sub>11</sub> F <sub>10</sub> NO <sub>3</sub> | CH <sub>5</sub> B <sub>11</sub> F <sub>10</sub> NO <sub>0.5</sub> | C <sub>9</sub> H <sub>23</sub> B <sub>11</sub> F <sub>10</sub> N <sub>2</sub> | C <sub>4</sub> H <sub>19</sub> B <sub>11</sub> FNO |
| Formula weight                                                | 356.98                                             | 473.13                                                                         | 348.11                                                            | 468.20                                                                        | 235.11                                             |
| <i>T</i> / K                                                  | 100                                                | 100                                                                            | 100                                                               | 100                                                                           | 100                                                |
| Crystal system                                                | orthorhombic                                       | monoclinic                                                                     | orthorhombic                                                      | monoclinic                                                                    | monoclinic                                         |
| Space group                                                   | <i>Iba2</i>                                        | <i>P2<sub>1</sub>/n</i>                                                        | <i>Ccc2</i>                                                       | <i>P2<sub>1</sub>/n</i>                                                       | <i>P2<sub>1</sub>/c</i>                            |
| <i>a</i> / Å                                                  | 12.356(4)                                          | 8.647(5)                                                                       | 14.684(4)                                                         | 13.3754(10)                                                                   | 9.8577(8)                                          |
| <i>b</i> / Å                                                  | 20.211(6)                                          | 14.863(7)                                                                      | 22.575(7)                                                         | 11.0807(8)                                                                    | 10.3265(8)                                         |
| <i>c</i> / Å                                                  | 9.735(3)                                           | 15.435(8)                                                                      | 14.269(4)                                                         | 13.7559(10)                                                                   | 13.5715(11)                                        |
| $\beta$ / deg                                                 |                                                    | 94.148(18)                                                                     |                                                                   | 102.726(3)                                                                    | 96.499(2)                                          |
| <i>V</i> / Å <sup>3</sup>                                     | 2431.2(12)                                         | 1978.5(17)                                                                     | 4730(2)                                                           | 1988.7(3)                                                                     | 1372.64(19)                                        |
| <i>Z</i>                                                      | 8                                                  | 4                                                                              | 16                                                                | 4                                                                             | 4                                                  |
| $\rho_{\text{calc.}}$ / g cm <sup>-3</sup>                    | 1.951                                              | 1.588                                                                          | 1.9543                                                            | 1.564                                                                         | 1.138                                              |
| $\mu$ / mm <sup>-1</sup>                                      | 0.216                                              | 0.161                                                                          | 0.216                                                             | 0.150                                                                         | 0.068                                              |
| <i>F</i> (000) / e                                            | 1376                                               | 944                                                                            | 2674.9                                                            | 944                                                                           | 488                                                |
| Refl. collected/unique                                        | 19274/2384                                         | 10659/3626                                                                     | 31184/4659                                                        | 25500/4066                                                                    | 14304/2726                                         |
| Refl. observed [ <i>I</i> > 2 $\sigma$ ( <i>I</i> )]          | 1862                                               | 2056                                                                           | 4010                                                              | 3225                                                                          | 2385                                               |
| <i>R</i> <sub>int</sub>                                       | 0.0957                                             | 0.0801                                                                         | 0.0639                                                            | 0.0492                                                                        | 0.0351                                             |
| Restraints/parameters                                         | 4/227                                              | 0/294                                                                          | 0/426                                                             | 0/300                                                                         | 0/217                                              |
| $\theta$ range / deg                                          | 1.93–26.00                                         | 1.91–25.50                                                                     | 1.65–26.00                                                        | 1.92–26.37                                                                    | 2.08–26.09                                         |
| <i>R</i> 1 [ <i>I</i> > 2 $\sigma$ ( <i>I</i> )] <sup>a</sup> | 0.0414                                             | 0.0740                                                                         | 0.0362                                                            | 0.0375                                                                        | 0.0405                                             |
| <i>wR</i> 2 (all data) <sup>b</sup>                           | 0.0869                                             | 0.1797                                                                         | 0.0957                                                            | 0.0969                                                                        | 0.1249                                             |
| GOF on <i>F</i> <sup>2c</sup>                                 | 1.309                                              | 1.175                                                                          | 1.0782                                                            | 1.075                                                                         | 1.073                                              |
| Larg. diff. peak/hole / e Å <sup>-3</sup>                     | 0.309/−0.413                                       | 0.492/−0.475                                                                   | 0.341/−0.243                                                      | 0.263/−0.229                                                                  | 0.322/−0.197                                       |

<sup>a</sup>  $R1 = (\sum||F_o| - |F_c||) / \sum|F_o|$ . <sup>b</sup>  $wR2 = [\sum w(F_o^2 - F_c^2)^2 / \sum w(F_o^2)^2]^{0.5}$ , weight scheme:  $w = [\sigma^2 F_o + (aP)^2 + bP]^{-1}$ ;  $P = [\max(0, F_o^2) + 2F_c^2] / 3$ ; H1·H<sub>2</sub>O:  $a = 0.0031$ ,  $b = 4.6387$ ; H2·diglyme:  $a = 0.0169$ ,  $b = 3.6200$ ; H3·0.5H<sub>2</sub>O:  $a = 0.0528$ ,  $b = 0.5304$ ; [Et<sub>4</sub>N]**1**:  $a = 0.0455$ ,  $b = 0.4087$ ; H4·(CH<sub>3</sub>)<sub>2</sub>CO:  $a = 0.0815$ ,  $b = 0.2877$ ; <sup>c</sup> GOF:  $S = [\sum w(F_o^2 - F_c^2)^2 / (m - n)]^{0.5}$ ; ( $m$  = reflections,  $n$  = variables).

**Table S2** Energies, enthalpies and free energies as well as free energies of solvation<sup>a</sup> calculated at the B3LYP/6-311++G(d,p) level of theory.

| Compound                                                                                               | $E^{ZPC}$ [au] | $H$ [au]     | $G$ [au]     | $G_s(\text{H}_2\text{O})$ [kJ mol <sup>-1</sup> ]<br>gas phase model | $G_s(\text{H}_2\text{O})$ [kJ mol <sup>-1</sup> ]<br>solute model <sup>b</sup> |
|--------------------------------------------------------------------------------------------------------|----------------|--------------|--------------|----------------------------------------------------------------------|--------------------------------------------------------------------------------|
| [1-H-12-H <sub>2</sub> N- <i>closo</i> -1-CB <sub>11</sub> F <sub>10</sub> ] <sup>-</sup> ( <b>1</b> ) | -1367.570024   | -1367.548691 | -1367.615252 | -204.1                                                               | -207.0                                                                         |
| 1-H-12-H <sub>3</sub> N- <i>closo</i> -1-CB <sub>11</sub> F <sub>10</sub> ( <b>H1</b> )                | -1368.032236   | -1368.010643 | -1368.079101 | -135.4                                                               | -148.6                                                                         |
| [1-H-7-H <sub>2</sub> N- <i>closo</i> -1-CB <sub>11</sub> F <sub>10</sub> ] <sup>-</sup> ( <b>2</b> )  | -1367.570586   | -1367.549108 | -1367.618334 | -204.4                                                               | -209.3                                                                         |
| 1-H-7-H <sub>3</sub> N- <i>closo</i> -1-CB <sub>11</sub> F <sub>10</sub> ( <b>H2</b> )                 | -1368.027809   | -1368.006221 | -1368.074760 | -148.3                                                               | -169.9                                                                         |
| [1-H-2-H <sub>2</sub> N- <i>closo</i> -1-CB <sub>11</sub> F <sub>10</sub> ] <sup>-</sup> ( <b>3</b> )  | -1367.572853   | -1367.551667 | -1367.617578 | -206.3                                                               | -211.8                                                                         |
| 1-H-2-H <sub>3</sub> N- <i>closo</i> -1-CB <sub>11</sub> F <sub>10</sub> ( <b>H3</b> )                 | -1368.014879   | -1367.993338 | -1368.060589 | -179.3                                                               | -206.9                                                                         |

<sup>a</sup>  $G_s$  calculated using the conductor polarizable continuum model (CPCM). <sup>b</sup> The geometries were reoptimized within the CPCM.

**Table S3** Experimental<sup>a</sup> and calculated<sup>b</sup> chemical shifts of **1**, **H1**, **2**, **H2**, **3** and **H3**.

| Compound                                                                                               | <sup>1</sup> H        |                    | <sup>13</sup> C      | <sup>11</sup> B |        | <sup>19</sup> F |        |        |        |      |                     |        |        |        |        |        |
|--------------------------------------------------------------------------------------------------------|-----------------------|--------------------|----------------------|-----------------|--------|-----------------|--------|--------|--------|------|---------------------|--------|--------|--------|--------|--------|
|                                                                                                        | CH <sub>cluster</sub> | NH <sub>n</sub>    | C <sub>cluster</sub> | B2–B6           | B7–B11 | B12             | F2–F6  | F7–F11 |        |      |                     |        |        |        |        |        |
| [1-H-12-H <sub>2</sub> N- <i>closo</i> -1-CB <sub>11</sub> F <sub>10</sub> ] <sup>-</sup> ( <b>1</b> ) | 3.36                  | ≈ 1                | 15.9                 | -17.6           | -15.3  | -15.3           | -256.1 | -254.8 |        |      |                     |        |        |        |        |        |
| calculated                                                                                             | 1.80                  | -0.55              | 21.9                 | -19.3           | -16.6  | -16.1           | -289.5 | -288.1 |        |      |                     |        |        |        |        |        |
| 1-H-12-H <sub>3</sub> N- <i>closo</i> -1-CB <sub>11</sub> F <sub>10</sub> ( <b>H1</b> )                | 4.14                  | 6.49               | 22.5                 | -17.6           | -16.0  | -23.5           | -250.8 | -255.6 |        |      |                     |        |        |        |        |        |
| calculated                                                                                             | 2.70                  | 3.60               | 31.6                 | -19.4           | -18.5  | -26.8           | -275.5 | -289.4 |        |      |                     |        |        |        |        |        |
|                                                                                                        | CH <sub>cluster</sub> | NH <sub>n</sub>    | C <sub>cluster</sub> | B2+B3           | B4+B6  | B5              | B7     | B8+B11 | B9+B10 | B12  | F2+F3               | F4+F6  | F5     | F8+F11 | F9+F10 | F12    |
| [1-H-7-H <sub>2</sub> N- <i>closo</i> -1-CB <sub>11</sub> F <sub>10</sub> ] <sup>-</sup> ( <b>2</b> )  | 3.27                  | n. o. <sup>c</sup> | 18.0                 | -17.7           | -17.4  | -18.4           | -22.5  | -15.3  | -16.2  | -7.9 | -257.3              | -256.0 | -257.4 | -256.9 | -256.3 | -251.9 |
| calculated                                                                                             | 1.78                  | -0.47              | 23.8                 | -18.6           | -18.9  | -19.7           | -24.3  | -16.3  | -17.1  | -8.8 | -291.5              | -289.1 | -290.1 | -290.1 | -287.8 | -282.6 |
| 1-H-7-H <sub>3</sub> N- <i>closo</i> -1-CB <sub>11</sub> F <sub>10</sub> ( <b>H2</b> )                 | 3.88                  | 6.61               | 19.6                 | -16.9           | -16.9  | -15.5           | -31.4  | -15.5  | -15.5  | -8.1 | n.a.p. <sup>d</sup> | n.a.p. | -247.9 | n.a.p. | n.a.p. | -251.1 |
| calculated                                                                                             | 2.48                  | 3.61               | 25.4                 | -19.7           | -18.4  | -14.9           | -33.7  | -17.6  | -16.8  | -8.9 | -292.3              | -279.1 | -267.7 | -289.9 | -275.3 | -282.3 |
|                                                                                                        | CH <sub>cluster</sub> | NH <sub>n</sub>    | C <sub>cluster</sub> | B2              | B3+B6  | B4+B5           | B7+B11 | B8+B10 | B9     | B12  | F3+F6               | F4+F5  | F7+F11 | F8+F10 | F9     | F12    |
| [1-H-2-H <sub>2</sub> N- <i>closo</i> -1-CB <sub>11</sub> F <sub>10</sub> ] <sup>-</sup> ( <b>3</b> )  | 3.48                  | n. o.              | 18.7                 | -25.4           | -17.8  | -17.6           | -15.2  | -16.2  | -15.6  | -7.4 | -257.4              | -255.5 | -256.0 | -255.6 | -255.0 | -248.8 |
| calculated                                                                                             | 1.66                  | 0.00               | 26.7                 | -26.3           | -20.0  | -18.9           | -16.0  | -17.6  | -16.6  | -8.0 | -294.1              | -289.5 | -289.4 | -287.9 | -287.8 | -277.4 |
| 1-H-2-H <sub>3</sub> N- <i>closo</i> -1-CB <sub>11</sub> F <sub>10</sub> ( <b>H3</b> )                 | 3.78                  | 6.95               | 14.3                 | -32.0           | -18.0  | -17.1           | -15.2  | -15.9  | -13.1  | -6.9 | -257.1              | -252.9 | -256.0 | -253.1 | -248.0 | -245.0 |
| calculated                                                                                             | 1.89                  | 3.90               | 17.4                 | -34.5           | -20.9  | -18.1           | -17.0  | -16.9  | -11.5  | -6.9 | -294.3              | -278.2 | -289.9 | -275.9 | -261.7 | -260.7 |

<sup>a</sup> Solvent: CD<sub>3</sub>CN. <sup>b</sup> B3LYP/6-311++G(2d,p)/B3LYP/6-311++G(d,p). <sup>c</sup> n.o. = not observed. <sup>d</sup> n.a.p. = no assignment possible.

**Table S4** Experimental and calculated<sup>a</sup> atomic distances<sup>b</sup> of 1-H-7-H<sub>3</sub>N-*closo*-1-CB<sub>11</sub>F<sub>10</sub> (**H2**), [1-H-7-H<sub>2</sub>N-*closo*-1-CB<sub>11</sub>F<sub>10</sub>]<sup>−</sup> (**2**), 7-H<sub>3</sub>N-12-F-*closo*-1-CB<sub>11</sub>H<sub>10</sub> (**H4**), [7-H<sub>2</sub>N-12-F-*closo*-1-CB<sub>11</sub>H<sub>10</sub>]<sup>−</sup> (**4**) and related {*closo*-1-CB<sub>11</sub>} clusters.<sup>c</sup>

| Compound/anion           | <b>2</b><br>calc. | H2·diglyme<br>exp. | H2<br>calc.  | <b>4</b><br>calc. | H4·H <sub>2</sub> O<br>exp. | H4<br>calc. | [7-H <sub>2</sub> N- <i>closo</i> -1-CB <sub>11</sub> H <sub>11</sub> ] <sup>−</sup><br>calc. | 7-H <sub>3</sub> N- <i>closo</i> -1-CB <sub>11</sub> H <sub>11</sub><br>calc. |
|--------------------------|-------------------|--------------------|--------------|-------------------|-----------------------------|-------------|-----------------------------------------------------------------------------------------------|-------------------------------------------------------------------------------|
| Ref.                     | <sup>d</sup>      | <sup>d</sup>       | <sup>d</sup> | 1                 | <sup>d</sup>                | 1           | 1                                                                                             | 1                                                                             |
| <i>d</i> (B–N)           | 1.472             | 1.529(6)           | 1.562        | 1.493             | 1.546(2)                    | 1.579       | 1.496                                                                                         | 1.586                                                                         |
| <i>d</i> (C–B2/B3)       | 1.718             | 1.717(8)           | 1.704        | 1.706             | 1.704(2)                    | 1.698       | 1.702                                                                                         | 1.697                                                                         |
| <i>d</i> (C–B4/B6)       | 1.716             | 1.716(8)           | 1.736        | 1.706             | 1.715(2)                    | 1.716       | 1.710                                                                                         | 1.717                                                                         |
| <i>d</i> (C–B5)          | 1.717             | 1.726(7)           | 1.728        | 1.704             | 1.714(2)                    | 1.714       | 1.711                                                                                         | 1.709                                                                         |
| <i>d</i> (B2–B3)         | 1.788             | 1.803(8)           | 1.815        | 1.772             | 1.789(2)                    | 1.797       | 1.786                                                                                         | 1.796                                                                         |
| <i>d</i> (B2–B6/B3–B4)   | 1.800             | 1.789(8)           | 1.792        | 1.779             | 1.776(2)                    | 1.778       | 1.784                                                                                         | 1.775                                                                         |
| <i>d</i> (B5–B4/B6)      | 1.796             | 1.796(9)           | 1.808        | 1.784             | 1.785(2)                    | 1.781       | 1.777                                                                                         | 1.781                                                                         |
| <i>d</i> (B2/B3–B7)      | 1.782             | 1.772(7)           | 1.752        | 1.788             | 1.760(2)                    | 1.748       | 1.787                                                                                         | 1.751                                                                         |
| <i>d</i> (B2–B11/B3–B8)  | 1.772             | 1.778(7)           | 1.782        | 1.774             | 1.777(2)                    | 1.779       | 1.768                                                                                         | 1.782                                                                         |
| <i>d</i> (B6–B11/B4–B8)  | 1.777             | 1.789(8)           | 1.775        | 1.768             | 1.772(2)                    | 1.763       | 1.768                                                                                         | 1.770                                                                         |
| <i>d</i> (B6–B10/B4–B9)  | 1.779             | 1.788(8)           | 1.796        | 1.773             | 1.771(2)                    | 1.780       | 1.769                                                                                         | 1.780                                                                         |
| <i>d</i> (B5–B9/B10)     | 1.779             | 1.774(8)           | 1.788        | 1.771             | 1.768(2)                    | 1.775       | 1.776                                                                                         | 1.777                                                                         |
| <i>d</i> (B7–B8/B11)     | 1.823             | 1.798(8)           | 1.782        | 1.798             | 1.779(2)                    | 1.761       | 1.814                                                                                         | 1.759                                                                         |
| <i>d</i> (B8–B9/B10–B11) | 1.815             | 1.818(8)           | 1.814        | 1.794             | 1.787(2)                    | 1.788       | 1.781                                                                                         | 1.783                                                                         |
| <i>d</i> (B9–B10)        | 1.817             | 1.794(9)           | 1.833        | 1.789             | 1.793(2)                    | 1.800       | 1.792                                                                                         | 1.796                                                                         |
| <i>d</i> (B7–B12)        | 1.810             | 1.797(8)           | 1.775        | 1.813             | 1.772(2)                    | 1.764       | 1.788                                                                                         | 1.755                                                                         |
| <i>d</i> (B8/B11–B12)    | 1.791             | 1.792(9)           | 1.808        | 1.783             | 1.787(2)                    | 1.797       | 1.785                                                                                         | 1.795                                                                         |
| <i>d</i> (B9/B10–B12)    | 1.801             | 1.790(9)           | 1.794        | 1.780             | 1.779(2)                    | 1.775       | 1.790                                                                                         | 1.781                                                                         |
| <i>d</i> (B2–F2/B3–F3)   | 1.367             | 1.361(6)           | 1.360        | –                 | –                           | –           | –                                                                                             | –                                                                             |
| <i>d</i> (B4–F4/B6–F6)   | 1.366             | 1.359(7)           | 1.351        | –                 | –                           | –           | –                                                                                             | –                                                                             |
| <i>d</i> (B5–F5)         | 1.366             | 1.363(7)           | 1.351        | –                 | –                           | –           | –                                                                                             | –                                                                             |
| <i>d</i> (B8–F8/B11–F11) | 1.376             | 1.365(7)           | 1.371        | –                 | –                           | –           | –                                                                                             | –                                                                             |
| <i>d</i> (B9–F9/B10–F10) | 1.373             | 1.377(6)           | 1.358        | –                 | –                           | –           | –                                                                                             | –                                                                             |
| <i>d</i> (B12–F12)       | 1.378             | 1.367(7)           | 1.372        | 1.395             | 1.3865(15)                  | 1.392       | –                                                                                             | –                                                                             |

<sup>a</sup> B3LYP/6-311++G(d,p). <sup>b</sup> All *d*(CB), *d*(BB) and *d*(BF) distances are mean values for *C*<sub>5v</sub> symmetry of the carborane cage; *d*(NH) are mean values. <sup>c</sup> Atomic distances in Å. <sup>d</sup> This work.

**Table S5** Experimental and calculated<sup>a</sup> atomic distances<sup>b</sup> of 1-H-2-H<sub>3</sub>N-*closo*-1-CB<sub>11</sub>F<sub>10</sub> (**H3**), [1-H-2-H<sub>2</sub>N-*closo*-1-CB<sub>11</sub>F<sub>10</sub>]<sup>-</sup> (**3**) and related {*closo*-1-CB<sub>11</sub>} clusters.<sup>c</sup>

| Compound/anion           | <b>3</b>     | H3·0.5H <sub>2</sub> O | H3           | [2-H <sub>2</sub> N- <i>closo</i> -1-CB <sub>11</sub> H <sub>11</sub> ] <sup>-</sup> | 2-H <sub>3</sub> N- <i>closo</i> -1-CB <sub>11</sub> H <sub>11</sub> ·EtOH | 2-H <sub>3</sub> N- <i>closo</i> -1-CB <sub>11</sub> H <sub>11</sub> |
|--------------------------|--------------|------------------------|--------------|--------------------------------------------------------------------------------------|----------------------------------------------------------------------------|----------------------------------------------------------------------|
|                          | calc.        | exp.                   | calc.        | calc.                                                                                | exp.                                                                       | calc.                                                                |
| Ref.                     | <sup>d</sup> | <sup>d</sup>           | <sup>d</sup> | 2                                                                                    | 3                                                                          | 2                                                                    |
| <i>d</i> (B–N)           | 1.460        | 1.530(4)               | 1.556        | 1.483                                                                                | 1.5396(10)                                                                 | 1.579                                                                |
| <i>d</i> (C–B2)          | 1.763        | 1.687(4)               | 1.671        | 1.744                                                                                | 1.6872(11)                                                                 | 1.672                                                                |
| <i>d</i> (C–B3/B6)       | 1.700        | 1.733(4)               | 1.729        | 1.699                                                                                | 1.7202(12)                                                                 | 1.723                                                                |
| <i>d</i> (C–B4/B5)       | 1.707        | 1.721(4)               | 1.724        | 1.701                                                                                | 1.7075(12)                                                                 | 1.710                                                                |
| <i>d</i> (B2–B3/B6)      | 1.793        | 1.788(4)               | 1.765        | 1.789                                                                                | 1.7697(12)                                                                 | 1.757                                                                |
| <i>d</i> (B3–B4/B5–B6)   | 1.803        | 1.804(4)               | 1.795        | 1.782                                                                                | 1.7782(12)                                                                 | 1.776                                                                |
| <i>d</i> (B4–B5)         | 1.788        | 1.807(4)               | 1.816        | 1.777                                                                                | 1.7885(13)                                                                 | 1.790                                                                |
| <i>d</i> (B2–B7/B11)     | 1.783        | 1.778(5)               | 1.756        | 1.785                                                                                | 1.7668(12)                                                                 | 1.744                                                                |
| <i>d</i> (B3–B7/B6–B11)  | 1.781        | 1.793(5)               | 1.789        | 1.774                                                                                | 1.7805(12)                                                                 | 1.783                                                                |
| <i>d</i> (B3–B8/B6–B10)  | 1.787        | 1.781(5)               | 1.778        | 1.774                                                                                | 1.7639(12)                                                                 | 1.767                                                                |
| <i>d</i> (B4–B8/B5–B10)  | 1.781        | 1.791(5)               | 1.793        | 1.776                                                                                | 1.7789(12)                                                                 | 1.781                                                                |
| <i>d</i> (B4/B5–B9)      | 1.779        | 1.790(5)               | 1.787        | 1.773                                                                                | 1.7731(12)                                                                 | 1.775                                                                |
| <i>d</i> (B7–B11)        | 1.795        | 1.811(4)               | 1.815        | 1.784                                                                                | 1.7985(12)                                                                 | 1.801                                                                |
| <i>d</i> (B7–B8/B10–B11) | 1.806        | 1.809(4)               | 1.807        | 1.784                                                                                | 1.7876(12)                                                                 | 1.786                                                                |
| <i>d</i> (B9–B8/B10)     | 1.818        | 1.828(4)               | 1.829        | 1.792                                                                                | 1.7888(12)                                                                 | 1.791                                                                |
| <i>d</i> (B7/B11–B12)    | 1.803        | 1.803(4)               | 1.799        | 1.785                                                                                | 1.7799(12)                                                                 | 1.783                                                                |
| <i>d</i> (B8/B10–B12)    | 1.803        | 1.806(4)               | 1.823        | 1.784                                                                                | 1.7873(12)                                                                 | 1.792                                                                |
| <i>d</i> (B9–B12)        | 1.799        | 1.799(4)               | 1.811        | 1.783                                                                                | 1.7822(12)                                                                 | 1.784                                                                |
| <i>d</i> (B3–F3/B6–F6)   | 1.370        | 1.348(4)               | 1.366        | –                                                                                    | –                                                                          | –                                                                    |
| <i>d</i> (B4–F4/B5–F5)   | 1.366        | 1.345(4)               | 1.352        | –                                                                                    | –                                                                          | –                                                                    |
| <i>d</i> (B7–F7/B11–F11) | 1.377        | 1.362(3)               | 1.371        | –                                                                                    | –                                                                          | –                                                                    |
| <i>d</i> (B8–F8/B10–F10) | 1.374        | 1.372(4)               | 1.358        | –                                                                                    | –                                                                          | –                                                                    |
| <i>d</i> (B9–F9)         | 1.373        | 1.353(4)               | 1.357        | –                                                                                    | –                                                                          | –                                                                    |
| <i>d</i> (B12–F12)       | 1.373        | 1.362(4)               | 1.358        | –                                                                                    | –                                                                          | –                                                                    |

<sup>a</sup> B3LYP/6-311++G(d,p). <sup>b</sup> All *d*(CB), *d*(BB) and *d*(BF) distances are mean values for C<sub>5v</sub> symmetry of the carborane cage; *d*(NH) are mean values. <sup>c</sup> Atomic distances in Å. <sup>d</sup> This work.

## References

- S1 S. Z. Konieczka, A. Himmelspach, M. Hailmann, M. Finze, *Eur. J. Inorg. Chem.*, 2013, 134–146.
- S2 M. Finze, *Chem. Eur. J.*, 2009, **15**, 947–962.
- S3 A. Himmelspach, G. J. Reiss, M. Finze, *Acta Crystallogr.*, 2011, **E67**, o704.
